# Supplementary material for: External Counterpulsation Improves Angiogenesis by Preserving Vascular Endothelial Growth Factor-A and Vascular Endothelial Growth Factor Receptor-2 but Not Regulating MicroRNA-92a Expression in Patients With Refractory Angina
Source: Front Cardiovasc Med. 2021 Oct 25;8:761112. doi: 10.3389/fcvm.2021.761112 (PMC8573065; doi:10.3389/fcvm.2021.761112)
Supplement: Supplementary file 1 [file Table_1.XLSX]

## Sheet: Sheet1
Supplementary File 1. Research Data
Group	Initials	Gender	Birthdate	Age (yrs)	Age in category	Diagnosis	DM	Smoking	Stop smoking	Alcohol	Frequency	Hypertension	Dyslipidemia	Stroke	Family History	Physical Activity	physical activity frequency	Aspirin	if yes :	clopidogrel	if yes :	Ticagrelol	if yes :	isosorbid dinitrate	if yes :	isosorbid mononitrat	if :	Nitrokaf	if yes :	Nitrat	ACE-I	if yes :	ARB	if yes :	beta bloker	if yes	statin	if yes :	Trimetazidine	if yes :	dicuretic	if yes :	Anti aritmia	if yes :	CCB	if yes :	Other medication	BMI, pre-intervention	BMI (category), pre-intervention
ECP	W	male	1954-03-05	64	>= 60 years	APS CCS II	yes	yes	>10 years	no		no	yes	no	0	yes	seldom	yes	Miniaspi 80x1	no		yes	Brilinta 90x1	no		no		yes	Nitrokaf Retard x1	yes	no		no	Candesartan 8 mg	yes	Concor 10x1	yes	Atorvastatin 20x1	no		no		no		yes	Amlodipine x1	Brilinta 90x1, Metformin 500x1, Glimeperide 2x1	22:00:00	Normal
ECP	Sy	male	1963-04-10	55	< 60 years	CAD 3VD	yes	no	no pernah merokok	no		yes	yes	yes	yes	no		yes	Miniaspi 80mg	yes	Clopidogrel Bisulfate 75mg	no		no		no		no		no	no		yes	candesartan 8 mg	yes	Concor 2,5mg	yes	Simvastatin 20mg	no		yes	Furosemide 40mg, Spirinolactine 25mg	no		no		Metformin 500mg, Allopurinol 300mg	1 day, 4:06:00	Obesitas
ECP	CM	male	1950-10-30	67	>= 60 years	APS CCS II, graft failure, riw CABG (2005)	no	yes	<10 years	no		yes	yes	no	0	yes	seldom	yes	Miniaspi 80mg	no		no		no		no		no		no	yes	Ramipril 5mg	no		yes	Concor 2,5mg	yes	Simvastatin 20mg	no		no		no		yes	Amlodipin 5mg		1 day, 3:04:00	Obesitas
ECP	BES	male	1956-09-22	61	>= 60 years	UAP TIMI 4/7 Grace 123 Crisade 49	no	yes	<10 years	yes	sometimes	yes	no	yes	yes	no		yes	Miniaspi 80mg	no		yes	Brilinta 90mg	yes	ISDN 5mg	no		yes	Nitrokaf Retard	yes	no		no		yes	Bloc Carvedilol 25mg, Concor 2,5mg	yes	Simvastatin 20mg	no		yes	Spirinolactone 25mg	no		no		Omeprazole 20mg, Gliquidone 30mg	1 day, 4:01:00	Obesitas
ECP	JWS	male	1949-09-16	69	>= 60 years	APS CCS II, CHF ec CAD 2VD, DM Type II	yes	yes	>10 years	no		yes	yes	no	yes	no		no		yes	Clopidogrel Bisulfate 75mg	no		yes	ISDN 10mg	no		yes	Nitrokaf Retard 2,5mg	yes	no		no		yes	Bisoprolol 2,5mg	yes	Atorvastatin	no		yes	HCT 25mg	no		yes	Adalat Oros	Lansoprazole 30mg, Glimeperide, Metformin, Micardis 80mg, Clonidin 0,15mg, Mecobalamin, Gaba 75mg	1 day, 7:04:00	Obesitas
ECP	AB	male	1947-07-14	71	>= 60 years	NSTEMI, CAD 3VD post PCI RCA, CHF ec CAD, SPECT MPI	no	yes	>10 years	no		yes	no	no	0	yes	frequently	yes	Miniaspi 80mg	yes	Clopidogrel Bisulfate 75mg	no		yes	ISDN 5mg	no		no		yes	no		yes	candesartan 16mg	yes	Concor 2,5mg	yes	Simvastatin 20mg	no		yes	Spirinolactone 25mg, Furosemide 40mg	no		yes	Amlodipin 5mg		1 day, 5:00:00	Obesitas
ECP	D	male	1973-01-08	45	< 60 years	APS CCS II, CAD 3VD post PTCA	no	yes	>10 years	yes	everyday	no	no	no	yes	yes	everyday	yes	Miniaspi 80mg	no		yes	Brilinta 90mg	no		no		yes	Nitrokaf Retard 2,5mg	yes	no		yes	candesartan 8 mg	yes	Bisoprolol 5mg	yes	Rosuvastatin 10mg	no		no		no		no			1 day, 1:00:00	Obesitas
ECP	SR	male	1971-05-13	47	< 60 years	APS CCS II, CAD 2VD+LM	no	yes	<10 years	yes	seldom	yes	yes	no	0	yes	seldom	yes	Miniaspi 1x80mg	no		no		yes	ISDN 5mg	no		yes	Nitrokaf 2x2,5mg	yes	yes	Ramipril 1x5mg	no		yes	Bisoprolol 1x5mg (1/2 tablet)	yes	Simvastatin 1x20mg	no		yes	Spirinolactone 1x25mg	no		no			1 day, 4:00:00	Obesitas
ECP	Am	male	1960-07-13	58	< 60 years	CAD 3VD, DM, HT	yes	yes	<10 years	no		yes	no	no	0	yes	everyday	yes	Miniaspi 1x80mg	yes	Clopidogrel 1x75mg	no		no		no		yes	Nitrokaf 2x2,5mg	yes	yes	Ramipril 1x2,5mg	yes	Valsartan 1x80mg	yes	Concor 1x2,5mg	yes	Atorvastatin 1x40mg	yes	Arcerin 2x35mg	yes	Spirinolactone 1x12,5mg	no		no		Insulin (Novo Rapid Flexpen #4 --> 2 & Novo Rapid Flexpen #2 --> 2), Nitral SIL 500mg (dibawah lidah), Gabapentin 1x300mg	1 day, 2:00:00	Obesitas
ECP	FM	male	1967-02-06	52	< 60 years	APS CCS II, CAD 3VD, HHD, Dislipidemia	no	yes	<10 years	no		yes	yes	no	yes	yes	frequently	yes	Aspilet 1x80mg	yes	Clopidogrel 1x75mg	no		yes	ISDN 5mg	no		yes	Nitrokaf 2x5mg	yes	no		yes	candesartan 8 mg	yes	Concor 1x10mg	yes	Simvastatin 1x20mg	no		yes	Furosemide 1x40mg	no		no			1 day, 3:00:00	Obesitas
ECP	HH	male	1970-09-30	48	< 60 years	CAD 3VD s/p PCI, HT, DM	yes	no	no pernah merokok	no		yes	yes	yes	yes	no		yes	Miniaspi 1x80mg	no		no		yes	ISDN 5mg	no		yes	Nitrokaf 2x2,5mg	yes	yes	Ramipril 1x5mg	no		yes	Concor 1x2,5mg	yes	Simvastatin 1x20mg	no		no		no		yes	Amlodipin 1x5mg	Omeprazole 20mg	1 day, 1:00:00	Obesitas
ECP	LM	male	1965-04-22	54	< 60 years	CAD 3VD + LM disease	no	yes	<10 years	yes	sometimes	yes	yes	yes	yes	yes	everyday	no		yes	Clopidogrel1x75mg	no		no		no		yes	Nitrokaf 1x	yes	no	=	yes	candesartan 8 mg	yes	BetaOne 1x2,5mg	yes	Atorvastatin 1x20mg	no		no		no		yes	Amlodipin 1x5mg		1 day, 1:07:00	Obesitas
ECP	FR	male	1959-02-13	60	>= 60 years	CAD 3VD, menolak CABG	no	yes	<10 years	no		yes	yes	no	yes	yes	everyday	yes	Miniaspi 1x80mh	yes	Clopidogrel 1x75mg	no		yes	ISDN 5mg	no		yes	Nitrokaf 2x2,5mg	yes	yes	Ramipril 1x10mg	no		yes	Bisoprolol 1x5mg	yes	Simvastatin 1x20mg	no		yes	HCT 1x25mg	no		yes	Amlodipin 1x5mg		1 day, 3:00:00	Obesitas
ECP	MM	male	1946-01-21	73	>= 60 years	CAD3VD	yes	yes	<10 years	no		no	yes	no	0	no		no		yes	clopidogrel 75 mg	no		yes	ISDN 5 mg	no		no		yes	no		yes	candesartan 16mg	yes	v block 2x6.25 mg	yes	simvastatin 1x20 mg	no		no		no		yes	amlodipin 1x5 mg	gliquidone 2x15 mg, glucosamin, harnal 1x0,4 mg	1 day, 0:06:00	Normal
ECP	RMR	male	1963-08-05	56	< 60 years	NSTEMI	yes	no	no pernah merokok	no		no	yes	no	yes	yes	everyday	yes	miniaspi 1x80 mg	yes	clopidogrel 75 mg	no		no		no		no		no	no		yes	candesartan 8mg	yes	concor 1x2.5 mg	yes	simvastatin 1x20 mg	no		yes	furosemid 1x40 mg	no		no			1 day, 4:05:00	Obesitas
ECP	RG	male	1961-05-12	58	< 60 years	CAD 3VD, DM Type II	yes	yes	>10 years	yes	seldom	no	no	yes	yes	yes	seldom	yes	Miniaspi 1x80mg	yes	Clopidogrel 1x75mg	no		no		no		yes	Nitrokaf 2x2,5mg	yes	yes	Ramipril 1x20mg	no		yes	Bisoprolol 1x2,5mg	yes	Simvastatin 1x20mg, Atorvastatin 1x20mg	no		no		no		yes	Nifedipin (Adalat oros) 1x30mg		1 day, 0:09:00	Normal
ECP	AB	male	1969-07-02	50	< 60 years	CAD 3VD-LM + Konservatif	yes	yes	<10 years	yes	seldom	yes	no	no	yes	yes	seldom	yes	Miniaspi 1x80mg	yes	Clopidogrel 1x75mg	no		no		no		yes	Nitrokaf 2x5mg	yes	no		yes	candesrtan 8 mg	yes	Vbloc 2x6,25mg	yes	Simvastatin 1x20mg	no		no		no		yes	Amlodipin 1x5mg	Insulin Apidra Solostar 100 IU (12 unit --> Pagi, Siang, Malam), Insulin Levemire (12 unit --> Malam)	23:02:00	Normal
ECP	YS	male	1954-01-14	65	>= 60 years	CAD 3VD	no	yes	<10 years	yes	everyday	yes	yes	no	0	yes	seldom	yes	Aspilet	yes	Clopidogrel 1x75mg	no		no		no		yes	Nitrokaf 2x2,5mg	yes	no		yes	candesartan 8 mg	yes	Concor 1x2,5mg	yes	Simvastatin 1x20mg	no		yes	Farsix 1x20mg	no		no			1 day, 0:06:00	Normal
ECP	YMR	female	1950-10-22	69	>= 60 years	CAD 3VD	yes	no	no pernah merokok	no		yes	yes	yes	0	yes	seldom	yes	Miniaspi 1x80mg	yes	Clopidogrel 1x75mg	no		yes	ISDN 5mg	no		no		yes	no		yes	candesartan 2x16	yes	Bisoprolol 1x5mg	yes	Atorvastatin 1x20mg	no		yes	Hydrochlorotiazide 1x25mg	no		yes	Adalat Oros 1x30mg	Insulin 2 2 (Pagi, Siang, Malam), Insulin 2 6 (Malam), Clonidine 1x0,15mg, Allopurinol 2x100mg	1 day, 1:01:00	Obesitas
ECP	DE	male	1966-06-15	53	< 60 years	CAD 3VD post PCI 5 DES	yes	no	no pernah merokok	yes	seldom	no	yes	no	yes	yes	everyday	yes	Miniaspi 1x80mg	no		no		yes	ISDN 5mg	no		no		yes	no		no		yes	Concor 1x2,5mg	yes	Atorvastatin 1x20mg	yes	Angintriz 2x30mg	yes	Furosemide 1x40mg	no		no		Uperio 2x25mg, Gliquidone 2x15mg, Mecobalamin 2x500mg, Metformin 2x500mg	1 day, 3:02:00	Obesitas
ECP	LH	male	1962-07-14	57	< 60 years	APS, CAD post PCI	yes	yes	<10 years	no		no	yes	no	0	yes	frequently	yes	Aspilet 1x80mg	yes	Clopidogrel 1x75mg	no		no		no		yes	Nitrokaf 2x5mg	yes	yes	Ramipril 1x10mg	no		yes	Concor 1x5mg	yes	Atorvastatin 1x20mg	no		yes	Spirinolactone 1x25mg	no		yes	Herbesser 1x100mg	Glimeperide 2x2mg, Metformin 2x500mg, Lantus 100mg (Malam - 14 Unit)	1 day, 2:07:00	Obesitas
ECP	PW	male	1959-10-20	60	>= 60 years	CHF, CAD DM Type II	yes	yes	<10 years	no		no	yes	no	yes	no		yes	Thromboaspilet 1x80mg	no		no		no		no		no		no	no		no		yes	Concor 1x5mg	yes	Crestor 1x20mg	no		yes	Spirinolactone 1x25mg, Lasix 2x40mg	no		no		Novorapid Fkexpen 100 IU/ML, Levemire Flexpen 100 IU/ML, Uperio 2x50mg, Coralan 2x5mg, Janumet 1x500mg/1000mg	1 day, 0:09:00	Normal
ECP	KS	female	1960-12-23	59	< 60 years	CAD 2 VD, stent patent LAD	yes	no	no pernah merokok	no		no	yes	no	0	yes	seldom	yes	Miniaspi 1x80mg	no		no		no		no		yes	Nitrokaf 2x5mg	yes	no		yes	candesartan 16mg	yes	Vbloc 2x6,25mg	yes	Simvastatin 1x20mg	yes	Trizedon MR 2x35mg	yes	Furosemide 1x40mg	no		yes	Herbesser CD 1x200mg	Levemire Flexpen (20), Glimperide 1x	1 day, 7:08:00	Obesitas
ECP	SI	male	1969-10-14	50	< 60 years	Second Wind Angina	no	yes	<10 years	no		no	yes	no	yes	yes	everyday	yes	Cardioaspirin 1x100mg	yes	Plavix 1x75mg	no		no		no		no		no	no		no		no		yes	Atorvastatin 1x40mg	no		no		no		no			1 day, 1:04:00	Obesitas
ECP	J	male	1956-12-28	63	>= 60 years	APS CCS II, CAD3VD, post PTCA	yes	yes	>10 years	no		yes	yes	no	0	yes	seldom	yes	tromboaspilet 1x80 mg	yes	CPG 1x75 mg	no		yes	ISDN 3x5 mg	no		yes	nitrokaf 2x5 mg	yes	no		yes	candesartan2x8mg	yes	v block 2x6,25 mg	yes	atorvastatin 1x20 mg	yes	Trizedon 2x35 mg	yes	furosemide 2x40 mg	no		yes	amlodipin 1x2,5 mg	novorapid 3x20 unit, lantus solostar	1 day, 3:04:00	Obesitas
Sham	P	male	1962-06-19	56	< 60 years	CAD 2VD	no	yes	>10 years	no		yes	yes	yes	0	no		yes	Miniaspi 80mg	yes	Clopidogrel 75 mg	no		no		no		yes	Nitrokaf Retard 2,5mg	yes	no		yes	Candesartan 16mg	yes	Bisoprolol 5mg	yes	Simvastatin 20mg	no		yes	Hydrochlorothiazide 25ml	no		yes	Amlodipine 5mg		1 day, 5:00:00	Obesitas
Sham	BS	male	1953-10-23	64	>= 60 years	CHF ec CAD, CAD 3VD	no	yes	<10 years	yes	seldom	no	no	no	0	no		yes	Miniaspi 80 mg	no		no		no		no		yes	Nitrokaf 2,5mg	yes	no		yes	Candesartan 8 mg	yes	V Bloc Carvedilol 6,25mg, Bisoprolol Fumarat 2,5mg	yes	Simvastatin 20mg	yes	Trimetazidine 35mg	yes	Spirinolactone 25mg	no		no		Harnal 400micrograms, Avodart 0,5mg	1 day, 3:00:00	Obesitas
Sham	Par	male	1968-01-01	50	< 60 years	CAD post CABG x2, PCI LTx RCA, Failed PCI, CTO LAD x4	no	yes	>10 years	yes	sometimes	yes	yes	no	0	yes	everyday	no		yes	Clopidogrel Bisulfate 75mg	no		yes	ISDN 5mg	yes	Cedocard 20mg	yes	Nitrokaf Retard 2,5mg	yes	no		yes	candesartan 8 mg	no		yes	Simvastatin 10mg	no		yes	Furosemide 40mg	no		yes	Amlodipine 5mg	Allopurinol 300mg, Lansoprazole, Ketosteril, Lanadexon 0,5mg	1 day, 2:06:00	Obesitas
Sham	SIS	male	1960-09-14	58	< 60 years	APS CCS II, CAD 2VD	yes	yes	>10 years	no		no	no	no	0	yes	frequently	yes	Miniaspi 80mg	yes	Clopidogrel Bisulfate 75mg	no		no		no		yes	Nitrokaf Retard 2,5mg	yes	no		yes	candesartan 8 mg	yes	Bisoprolol 10mg	no		no		no		no		no		Lipitor 40mg, Lansoprazole 30mg	22:00:00	Normal
Sham	AE	male	1969-06-25	49	< 60 years	APS CCS II, CAD 3VD post PCI	no	yes	>10 years	no		no	no	no	yes	yes	frequently	yes	Miniaspi 80mg	no		yes	Brilinta	yes	ISDN 5mg	no		yes	Nitrokaf Retard 2,5mg	yes	no		yes	candesartan 8 mg	yes	Bisoprolol 5mg	yes	Simvastatin 20mg	yes	Trimetazidine 35mg	no		no		no		Metformin 500mg, Lansoprazole 30mg	22:00:00	Normal
Sham	EMH	female	1964-04-16	54	< 60 years	CAD post CABG	yes	no	no pernah merokok	no		no	no	no	yes	no		yes	Miniaspi 80mg	yes	Clopidogrel 75mg	no		no		no		yes	Nitrokaf Retard 2,5mg	yes	no		no		yes	Bisoprolol 5mg	no		no		no		no		yes	Amlodipin 10mg	Metformin 500mg	1 day, 0:00:00	Normal
Sham	DS	male	1958-07-31	60	>= 60 years	APS post CABG	no	yes	?	no		no	no	yes	yes	yes	frequently	yes	Miniaspi 80mg	yes	Clopidogrel 75mg	no		yes	ISDN 5mg	no		yes	Nitrokaf Retard 5mg	yes	yes	Ramipril 5mg	no		yes	Bisoprolol 5mg	yes	Simvastatin 20mg	no		no		no		no		Piracetam 800mg, Metformin 500mg	22:00:00	Normal
Sham	AMS	male	1943-01-03	75	>= 60 years	CHF, CAD	yes	yes	>10 years	no		no	yes	no	yes	yes	seldom	no		yes	Clopidogrel 75mg	no		no		no		yes	Nitrokaf Retard 2,5mg	yes	yes	Ramipril 5mg	no		yes	Concor 2,5mg	yes	Atorvastatin 20mg	no		yes	Furosemide 40mg, Spirinolactine 25mg (1/2 tablet)	no		no		Metformin 500mg, Acarbose 50mg	22:00:00	Normal
Sham	M	male	1967-07-11	51	< 60 years	CAD	yes	yes	>10 years	no		no	yes	no	yes	no	seldom	yes	aspilet 80 mg	no		no		yes	ISDN 5 mg	no		yes	nitrokaf 2,5 mg	yes	no		yes	candesartan 16mg	yes	bisoprolol 10 mg	yes	simvastatin 20 mg	no		yes	spironolakton 100 mg, furosemide 40 mg	no		no		metformin 500 g, dorner 20 mcg	1 day, 2:03:00	Obesitas
Sham	YD	male	1944-02-05	74	>= 60 years	Post CABG, Post PTCA	no	no	no pernah merokok	no		no	yes	no	yes	yes	frequently	yes	Aspilet 1x80mg	no		no		no		no		yes	Nitrokaf 2x2,5mg	yes	no		yes	micardis 40 mg	no		yes	Atorvastatin 1x20mg	no		no		no		no		Nexium 40mg	23:00:00	Normal
Sham	S	male	1949-11-21	69	>= 60 years	APS CCS II, post CABG, DM	yes	no		no		yes	yes	no	0	yes	frequently	yes	miniaspi 1x80 mg	yes	Clopidogrel 1x75 mg	no		no		no		yes	nitrokaf 2x5 mg	yes	no		yes	candesartan 16mg	yes	bisoprolol 5 mg	yes	simvastatin 20 mg	no		yes	furosemide 40 mg	no		yes	amlodipin 5 mg	folic acid 2x1 mg, gliquidone 3x30 mg, harnal 1x0,4 mg, allopurinol 1x100 mg, bicnat 3x500 mg	1 day, 3:05:00	Obesitas
Sham	HH	male	1953-03-31	65	>= 60 years	CAD 3VD, optimal medika mentosa	yes	yes	<10 years	yes	seldom	no	no	no	0	no		yes	Miniaspi 1x80mg	yes	Clopidogrel 1x75mg	no		no		no		no		no	no		no		yes	Concor 1x2,5mg	no		no		yes	Spirinolactone 1x25mg, Furosemide 2x40mg	no		no		Metformin 3x500mg, Lantus Solostsr 100 IU, Uperio 2x50mg	21:00:00	Normal
Sham	YZ	female	1951-03-09	67	>= 60 years	Post CABG	no	no	no pernah merokok	no		yes	no	yes	yes	yes	seldom	no		yes	Clopidogrel 1x75mg	no		no		no		yes	Nitrokaf 2x5mg	yes	no		yes	candesartan 16mg	yes	Concor 1x2,5mg	yes	Simvastatin 1x20mg	no		yes	Furosemide 1x40mg, Spirinolactone 1x25mg	no		no		Cetirizine 1x10mg, Codipront (if lagi batuk saja)	21:00:00	Normal
Sham	SES	male	1945-05-07	72	>= 60 years	CAD post CABG, PCI, DM, HT	yes	yes	<10 years	no		yes	no	no	0	yes	seldom	no		yes	Clopidogrel 1x75mg	no		yes	Cedocard 5mg	no		yes	Nitrokaf 2x5mg	yes	yes	Ramipril 1x10mg	no		yes	Bisoprolol 1x5mg	yes	Simvastatin 1x20mg	no		no		no		yes	Amlodipin 1x5mg	Novo Rapid Flexpen 100 IU/ML (Pagi, Siang, Malam : @ 16 unit), Lantus Solostar 100 IU/ML INJ (Malam : 16 unit)	1 day, 0:00:00	Normal
Sham	Su	male	1964-07-07	54	< 60 years	CAD 3VD	yes	yes	<10 years	yes	seldom	yes	no	no	yes	yes	seldom	yes	Aspilet 2x80mg	no		no		no		no		yes	Nitrokaf 2x2,5mg	yes	no		yes	candesartan 4mg	no	Concor 1z1,25mg	yes	Atorvastatin 1x20mg	yes	Trizedon MR 2x35mg	no		no		no		Metformin 2x500mg, Glimeperide 1x4mg	1 day, 4:00:00	Obesitas
Sham	CS	male	1963-08-23	55	< 60 years	CHF fc II ec CAD	no	yes	<10 years	yes	sometimes	no	no	no	0	yes	everyday	no		yes	Clopidogrel 1x75mg	no		yes	ISDN 5mg	no		yes	Nitrokaf 2x2.5mg	yes	no		no		yes	Concor 1x2,5mg	yes	Simvastatin 1x20mg	no		no		no		no		V block 2x12.5mg , Notisil 1z2mg	23:02:00	Normal
Sham	Mu	female	1963-03-06	56	< 60 years	CAD3VD, HF	yes	no		no		no	yes	no	0	yes	seldom	no		yes	Clopidogrel 75 mg	no		no		no		yes	nitrokaf 2x5 mg	yes	no		yes	candesartan 16mg	yes	concor 10mg	yes	simvastatin 1x20 mg	no		yes	furosemide 40 mg, spironolakton 25 mg	no		no		gliquidone 3x30 mg, coralan 2x5 mg	1 day, 3:08:00	Obesitas
Sham	BKS	male	1969-06-10	49	< 60 years	CAD 2VD-Konf. OMT	no	yes	<10 years	yes	seldom	yes	yes	no	0	yes	frequently	yes	Cardioaspirin 1x80mg	yes	Clopidogrel 1x75mg	no		no		no		no		no	no		yes	candesartan 4 mg	yes	Nebivolol 1x2,5mg	yes	Atorvastatin 1x10mg	no		no		no		no			22:09:00	Normal
Sham	SP	male	1941-05-25	78	>= 60 years	CAD post CABG (2017)	no	no	no pernah merokok	no		no	yes	no	0	no		yes	Miniaspi 1x80mg	no		no		no		no		yes	Nitrokaf 1x2,5mg	yes	no		yes	candesartan 16mg	yes	Concor 1x16mg	yes	Atorvastatin 1x20mg	no		no		no		yes	Amlodipin 1x5mg		1 day, 2:09:00	Obesitas
Sham	SS	male	1962-03-15	57	< 60 years	CHF ec CAD (EF 32%)	no	yes	<10 years	no		yes	yes	yes	yes	no		yes	Miniaspi 1x80mg	yes	Clopidogrel 1x75mg	no		yes	ISDN 5mg	no		no		yes	no		yes	candesartan 16mg	yes	Concor 1x2,5mg	yes	Atorvastatin 1x20mg	no		yes	Spirinolactone 1x25mg	no		no			1 day, 3:09:00	Obesitas
Sham	IM	male	1949-11-06	70	>= 60 years	CHF ec CAD 3VD	no	yes	<10 years	no		yes	yes	no	0	no		yes	Miniaspi 1x80mg	no		no		no		no		yes	Nitrokaf 2x5mg	yes	yes	Ramipril 1x10mg	no		yes	Concor 1x10mg	yes	Simvastatin 1x20mg	no		yes	Spirinolactone 1x25mg, Furosemide 1x40mg	no		yes	Amlodipin 1x5mg		1 day, 0:02:00	Normal
Sham	ZR	male	1964-12-04	55	< 60 years	APS CCS II, CHF ec CAD	yes	yes	<10 years	no		no	no	no	yes	no		yes	Miniaspi 1x80mg	yes	Clopidogrel 1x75mg	no		yes	ISDN 5mg	no		yes	Nitrokaf 2x2,5mg	yes	yes	Lisinopril 1x10mg	no		yes	Concor 1x5mg	yes	Simvastatin 1x20mg	no		yes	Furosemide 1x40mg	no		no			22:03:00	Normal
Sham	JS	male	1949-08-15	70	>= 60 years	APS CCS II, HFrEF ec CAD (EF 43%)	yes	yes	>10 years	no		no	yes	no	0	yes	frequently	yes	Miniaspi 1x80mg	yes	Clopidogrel 1x75mg	no		yes	ISDN 5mg	no		no		yes	no		yes	candesartan 8 mg	yes	Concor 1x5mg	yes	Simvastatin 1x20mg	no		yes	Spirinolactone 1x25mg, Furosemide 1x40mg	no		no			21:04:00	Normal
Sham	LA	female	1951-07-17	68	>= 60 years	APS CCS II, CAD 3VD, HT	no	no	no pernah merokok	no		yes	yes	no	0	no		yes	Minisaspilet 1x80mg	yes	CPG 1x75mg	no		yes	ISDN 3x1	no		yes	Nitrokaf 2x1	yes	no		yes	candesartan 16mg	yes	Concor 1x2,5mg	yes	Atorvastatin 1x20mg	yes	Trizedon 2x35mg	no		no		yes	Amlodipin 1x2,5mg	Fenofibrat 1x100mg. Omega 3 1x100mg	1 day, 1:06:00	Obesitas
Sham	DS	male	1944-01-09	74	>= 60 years	APS CCS II, CAD 3VD	no	no	no pernah merokok	no		no	yes	yes	0	yes	everyday	yes	Miniaspi 80mg	yes	Clopidogrel Bisulfate 75mg	no		no		no		yes	Nitrokaf Retard 5mg	yes	yes	Ramipril 5mg	no		yes	Concor 2,5mg	yes	Simvastatin 20mg	no		yes	Furosemide 40mg	no		no		Ranitidine 150mg, Lansoprazole 30mg	1 day, 4:00:00	Obesitas
[truncated: 21 more columns]
